# Supplementary material for: Soybean antiviral immunity conferred by dsRNase targets the viral replication complex
Source: PubMed Central journal article supplement (PMC6764979; doi:10.1038/s41467-019-12052-5), 2019-09-27
Supplement: 41467_2019_12052_MOESM1_ESM.pdf [file 41467_2019_12052_MOESM1_ESM.pdf]

**Soybean antiviral immunity conferred by dsRNase targets the viral replication complex**

Ishibashi *et al.*



repeatedly found in the Peking genome (red box). The black box at the top indicates the location of the 3.6-kbp insertion in Williams 82 relative to Peking. (d) Alignment of the predicted amino acid sequences of Rsv4, NM\_001249088, and NM\_001253944. DEDD(N) motif is indicated by red boxes.

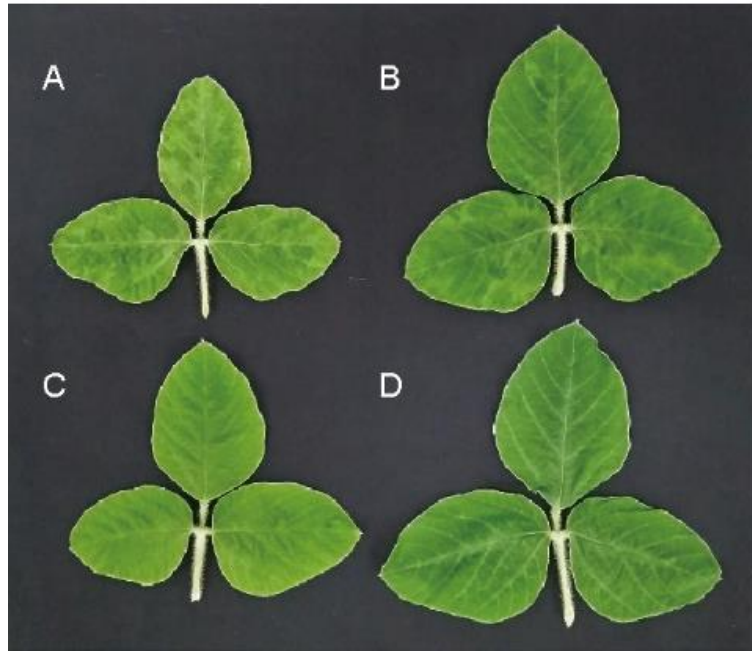

**Supplementary Fig. 2. Symptoms of the fourth leaves of SMV-C-inoculated Peking mutant plants at 15 dpi.** A, PeM-1355 (Pro49Ser); B, PeM-0220 (Pro49Leu); C, Peking (wild type [Pro49]); D, PeM-0220 (segregant with a wild-type sequence [Pro49Pro]).

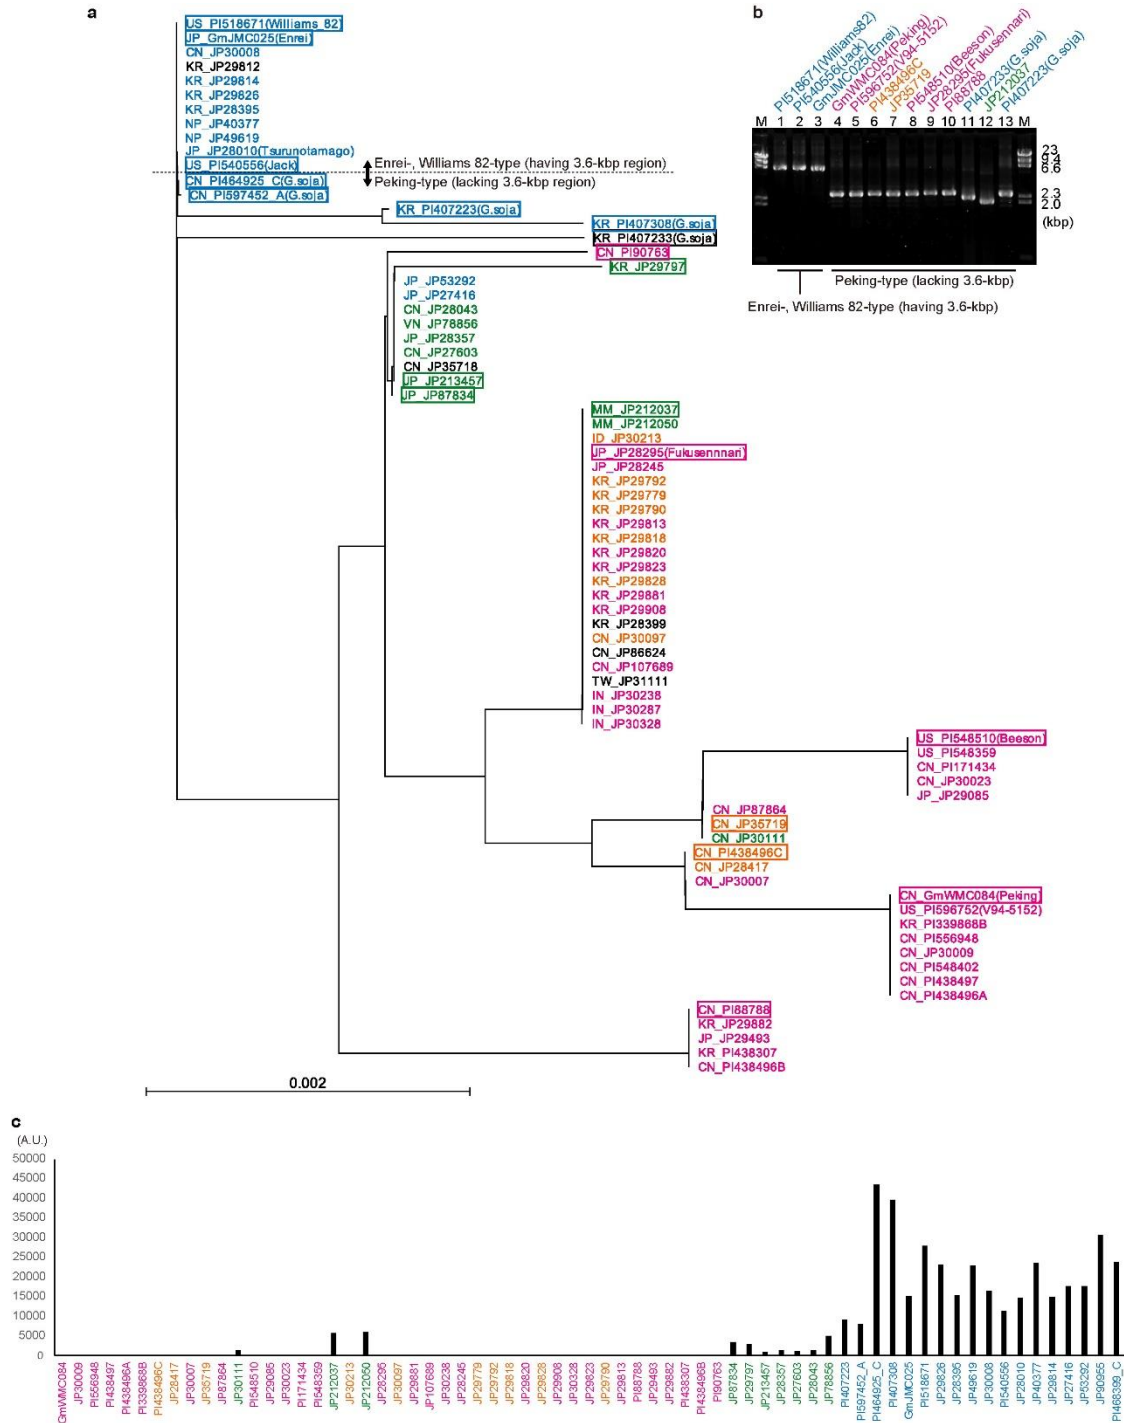

**Supplementary Fig. 3. Genetic variation in *Rsv4* among soybean germplasm.** Colors of accession names indicate SMV susceptibility: cyan, SMV CP was highly accumulated at 13 dpi; green, SMV CP was detectable at 13 dpi, orange, SMV CP was not detectable at 13 dpi but detectable at 21 dpi, magenta, SMV CP was not detectable until 21 dpi, and black, not examined. (a) Relationships between amino acid sequence variations in *Rsv4* and SMV sensitivity are illustrated on a phylogenetic tree. The *Rsv4* amino acid sequence of 63 accessions containing the 3.6-kbp deletion were aligned with those of the corresponding region (which is split into two ORFs by the 3.6-kbp insertion) in 11 accessions. Accession names in boxes indicate representative accessions. Each accession name in the tree starts with a country code followed by the accession number. The amino acid sequence of one wild soybean (*G. soja*) accession, PI464925\_C, had the same sequence as Williams 82 and Enrei except for the absence of the region corresponding to the 3.6-kbp deletion. (b) Amplification of the fragment encompassing the *Rsv4* ORF from representative accessions by PCR using an STS marker, *Rsv4*-Seq03. A 6-kbp PCR

fragment was amplified from several SMV-susceptible genetic resources containing the 3.6-kbp insertion (lanes 1–3). Among the accessions lacking the 3.6-kb insertion, a shorter (2.4-kbp) fragment was amplified from genetic resources that strongly inhibited SMV-C multiplication (lanes 4–10), whereas fragments from accessions that allowed SMV-CP accumulation at 13 dpi (lanes 11–13) varied in size. M: Lambda DNA *Hind*III digest. (c) Quantification of SMV CP accumulation at 13 dpi. Equal amounts of leaf patches from systemic leaves of three plants for each accession were mixed and homogenized for Western blotting. SMV CP bands were detected by LuminoGraph III (ATTO, Tokyo, Japan) and quantified using ImageJ. The source data of Supplementary Figure 3c are provided as a Source Data file.

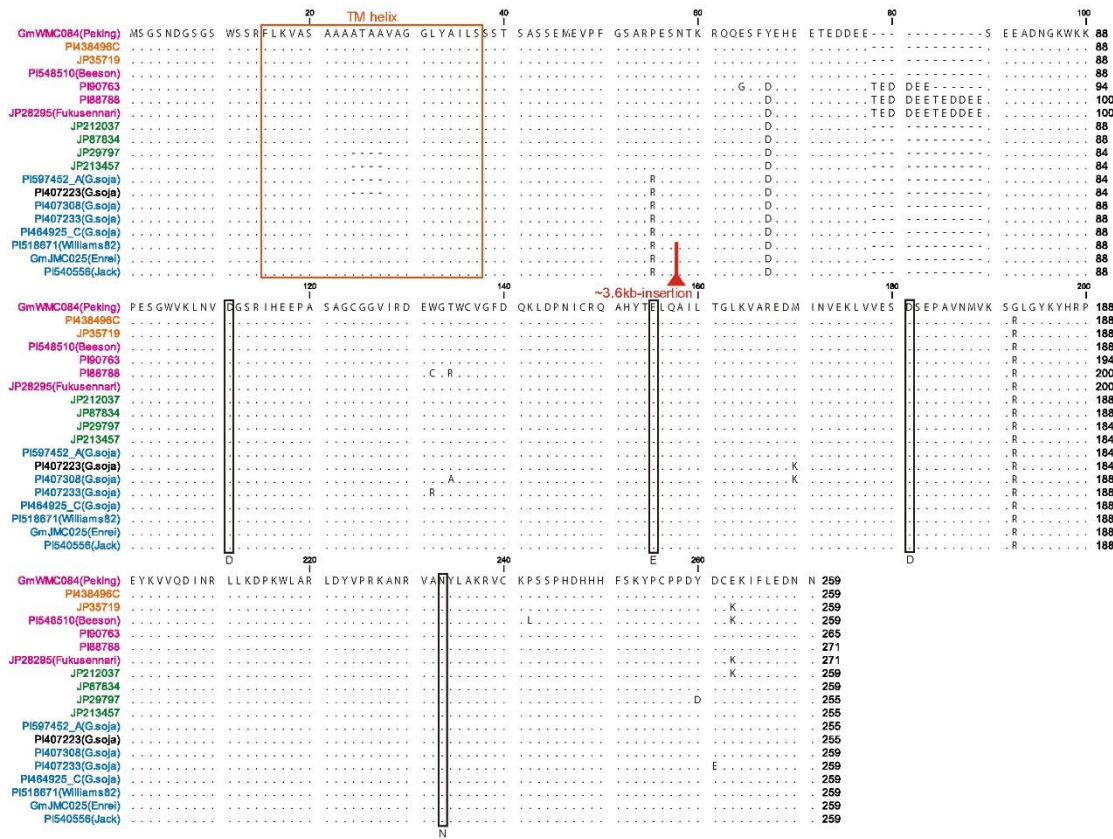

**Supplementary Fig. 4. Alignment of Rsv4 amino acid sequences of the 19 representative accessions.** Accession names are colored as in Supplementary Fig. 3. Deduced amino acid sequences of Rsv4 from sixteen accessions lacking the 3.6-kbp region, and the corresponding region of three accessions (bottom three rows) having the 3.6-kbp region are aligned.

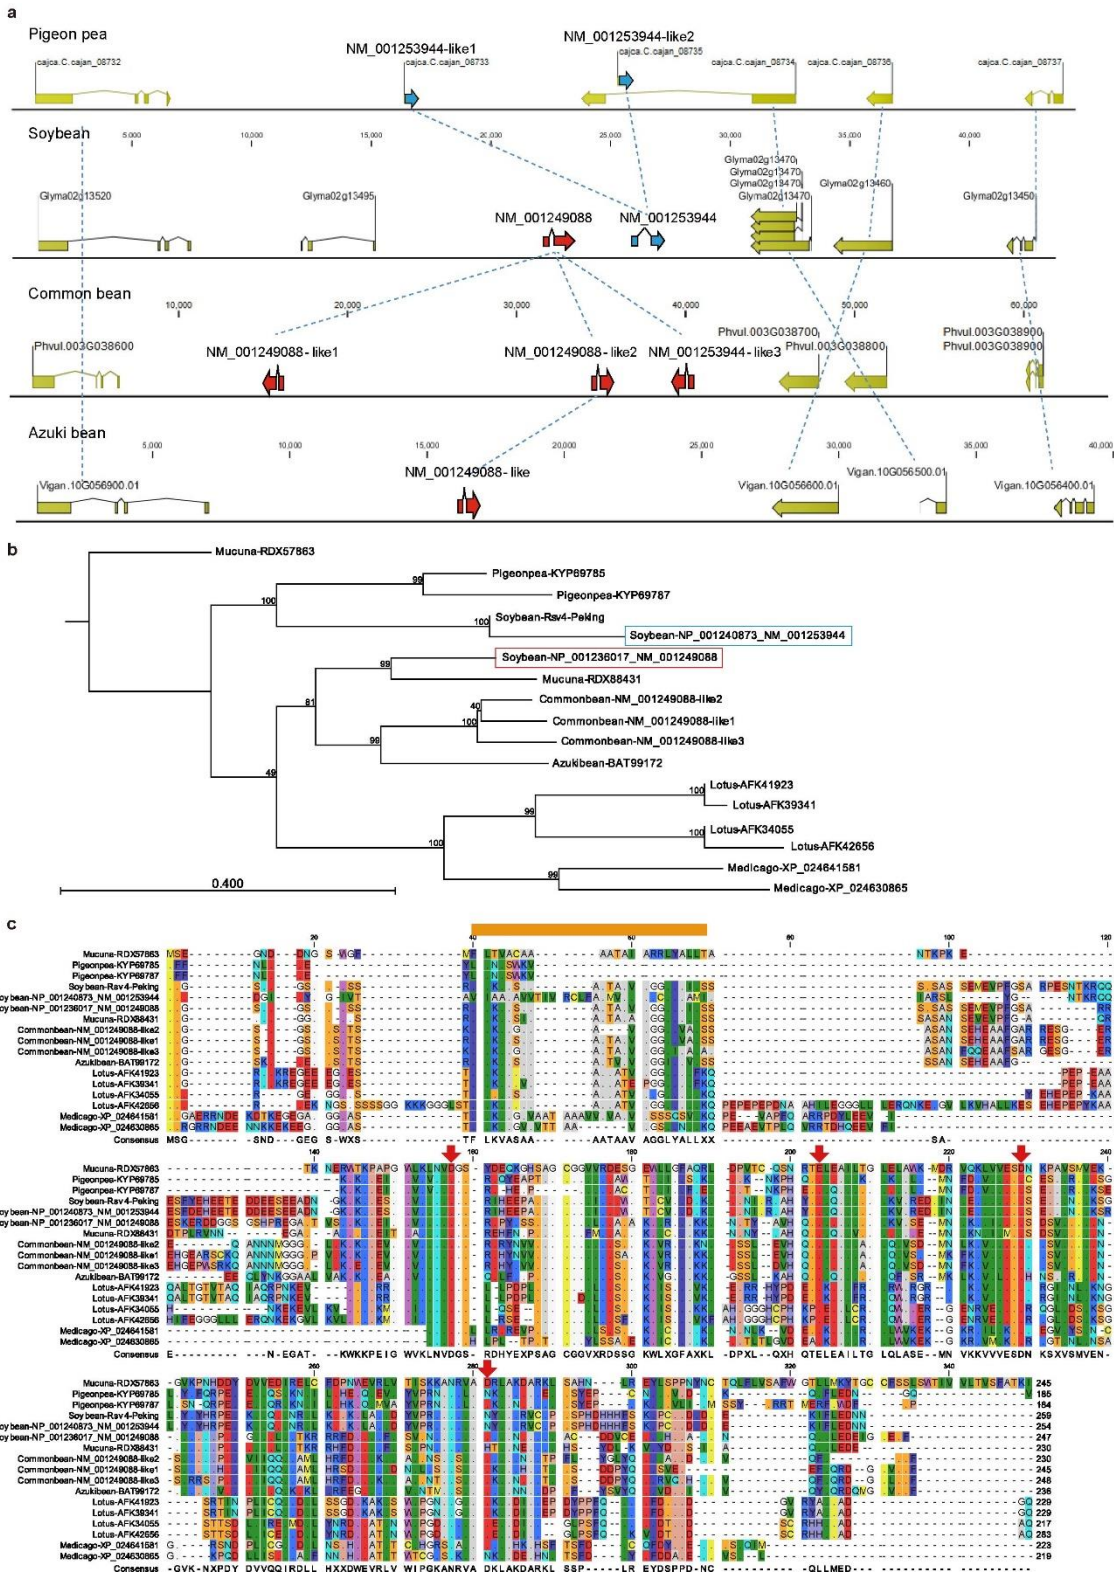

**Supplementary Fig. 5. Comparison of *Rsv4* locus among legumes.** (a) Comparison of *Rsv4* genomic region among four legumes. ORFs with similar nucleotide sequences are connected by dotted lines. The ORF sequence NM\_001249088 of soybean (red) was identified in the azuki bean and common bean genomes, whereas *Rsv4* (not shown) and ORF NM\_001253944 (blue) were identified in the pigeon pea genome. Other ORFs in the region are shown in yellow. (b) Phylogenetic relationships and (c) amino acid alignment of predicted protein sequences from *Rsv4* homologs. Sequence names in red and blue boxes in (b) indicate soybean ORFs NM\_001249088 and NM\_001253944, respectively. Orange bar and red arrows in (c) indicate the positions of the conserved transmembrane helix and DEDD/DEDN motif, respectively.



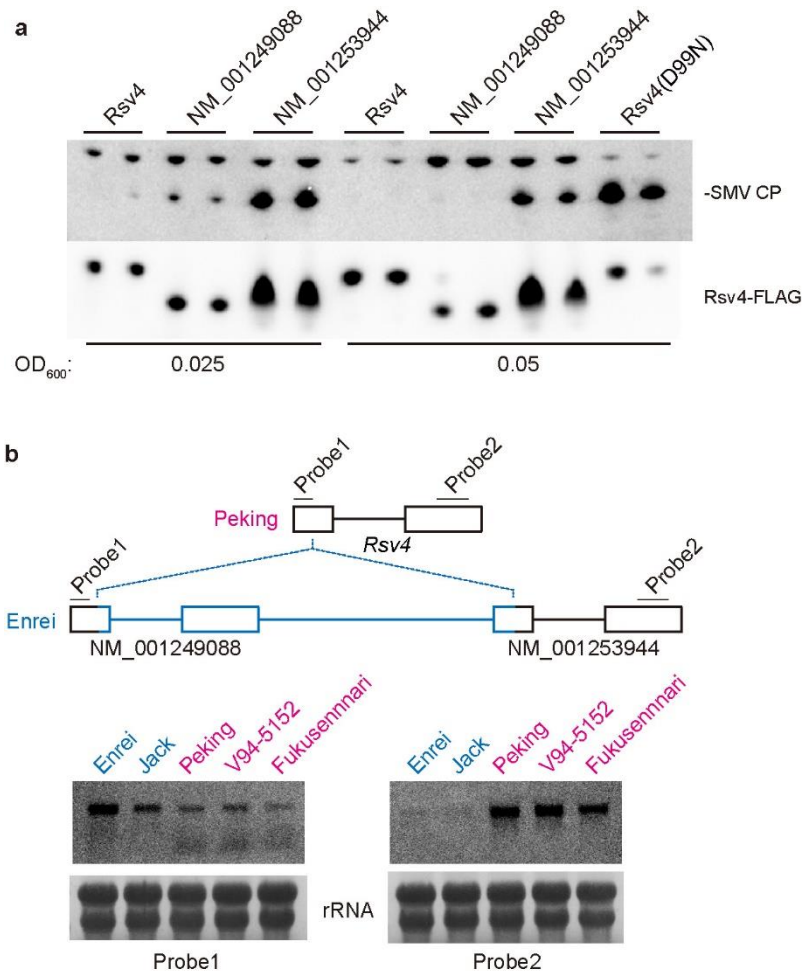

**Supplementary Fig. 6. An *Rsv4* allele in SMV-susceptible soybean encodes a potential inhibitor of potyvirus multiplication.** (a) Inhibition of SMV multiplication by NM\_001249088. FLAG-tagged *Rsv4*, NM\_001249088, and NM\_001253944 were expressed in *N. benthamiana* by agroinfiltration at indicated concentrations. One day after infiltration, *Agrobacterium* harboring SMV cDNA was infiltrated at  $OD_{600} = 0.01$ . Western blotting using anti-SMV CP and anti-FLAG was performed at 6 dpi. Each lane represents an individual plant. (b) Detection of mRNA for *Rsv4*, NM\_001249088, and NM\_001253944 by Northern blot hybridization. Twenty micrograms of total RNA were electrophoresed, and the mRNAs were detected by digoxigenin-labeled probes hybridize to the indicated positions. Ribosomal RNAs were detected by methylene blue staining as loading controls. The source data are provided as a Source Data file.

**Supplementary Table 1. Phenotypic segregation of SMV-C-inoculated Peking mutant lines with mutations in the *Rsv4* gene.**

|                                                                                            | Line name |          |          |          |           |        |
|--------------------------------------------------------------------------------------------|-----------|----------|----------|----------|-----------|--------|
|                                                                                            | PeM-1211  | PeM-0484 | PeM-0220 | PeM-1355 | PeM-1080  | Peking |
| Position in CDS (bp)                                                                       | 359       | 359      | 146      | 145      | 329       | NA     |
| Genotype of wild type                                                                      | G/G       | G/G      | C/C      | C/C      | C/C       | NA     |
| Genotype of the mutant                                                                     | G/A       | G/A      | C/T      | T/T      | T/T       | NA     |
| Amino acid change                                                                          | Trp120*   | Trp120*  | Pro49Leu | Pro49Ser | Ala110Val | NA     |
| Genotype of mutation site in progeny (Number of plants)                                    |           |          |          |          |           |        |
| Wild type (W)                                                                              | 5         | 4        | 5        | NA       | NA        | 16     |
| Heterozygous (H)                                                                           | 9         | 9        | 11       | NA       | NA        | NA     |
| Mutant type (M)                                                                            | 6         | 4        | 5        | 8        | 8         | NA     |
| Total                                                                                      | 20        | 17       | 21       | 8        | 8         | 16     |
| Chi square (1:2:1)                                                                         | 0.30      | 0.06     | 0.05     | NA       | NA        | NA     |
| <i>p</i> value (d.f.=2)                                                                    | 0.86      | 0.97     | 0.98     | NA       | NA        | NA     |
| Phenotype in progeny (Number of plants)                                                    |           |          |          |          |           |        |
| Resistant (R)                                                                              | 14        | 13       | 16       | 0        | 8         | 16     |
| Susceptible (S)                                                                            | 6         | 4        | 5        | 8        | 0         | 0      |
| Total                                                                                      | 20        | 17       | 21       | 8        | 8         | 16     |
| Chi square (3:1)                                                                           | 0.27      | 0.02     | 0.02     | NA       | NA        | NA     |
| <i>p</i> value (d.f.=1)                                                                    | 0.61      | 0.89     | 0.90     | NA       | NA        | NA     |
| Chi square test for linkage and independence of segregation between genotype and phenotype |           |          |          |          |           |        |
| R, W+H                                                                                     | 14        | 13       | 16       | NA       | NA        | NA     |
| R, M                                                                                       | 0         | 0        | 0        | NA       | NA        | NA     |
| S, W+H                                                                                     | 0         | 0        | 0        | NA       | NA        | NA     |
| S, M                                                                                       | 6         | 4        | 5        | NA       | NA        | NA     |
| Total                                                                                      | 20        | 17       | 21       | NA       | NA        | NA     |
| Chi square (12:0:0:4)                                                                      | 0.27      | 0.02     | 0.02     | NA       | NA        | NA     |
| <i>p</i> value (d.f.=3)                                                                    | 0.97      | 1.00     | 1.00     | NA       | NA        | NA     |
| Chi square (9:3:3:1)                                                                       | 26.22     | 15.73    | 19.72    | NA       | NA        | NA     |
| <i>p</i> value (d.f.=3)                                                                    | 8.6E-06   | 1.3E-03  | 1.9E-04  | NA       | NA        | NA     |

Chi-square tests for Mendelian segregation ratio and genetic linkage between susceptibility and genotype in the progeny of mutant lines were examined.

Asterisks denote nonsense mutations generating stop codons.

12:0:0:4 and 9:3:3:1 correspond to tests for complete linkage and independent segregation, respectively.
